# Supplementary material
Source: PubMed Central journal article supplement (PMC2903392)
Supplement: supp_M110.134114_jbc.M110.134114-1.pdf [file supp_M110.134114_jbc.M110.134114-1.pdf]

|            |                                                                 |     |     |     |     |     |
|------------|-----------------------------------------------------------------|-----|-----|-----|-----|-----|
|            | 10                                                              | 20  | 30  | 40  | 50  | 60  |
| Rat        | -MELKTEEEVGGVQPVSIQAFASSSTLHGLAHIFSYERLSLKRALWALCFLGSLAVLLC     |     |     |     |     |     |
| Xenopus1.1 | -MDVK-EAEELSSPQPLAIQAFASGSTLHGLAHIFTYERFSCRRLIWILCFLGSLSLLLF    |     |     |     |     |     |
| Xenopus1.2 | -MDVK-EAEELGSPQPLAVQAFASGSTLHGLAHIFTYERFSCRRLIWILCFLGSLSLLLF    |     |     |     |     |     |
| EFS        | -MDLKPPAEDGVSNHPASVEAFAKTSTLHGISHIFTYERFSFKRIIWTLAFLGSLSFVLVH   |     |     |     |     |     |
|            | 70                                                              | 80  | 90  | 100 | 110 | 120 |
| Rat        | VCTERVQYYFCYHHVTKLDEVAASQLTFPAVTLCNLNEFRFSQVSKNDLYHAGELLALLN    |     |     |     |     |     |
| Xenopus1.1 | VCTERIYYFEYPHVTKLDEISTPKMIFPAVTFCNLNEFRFSRVTKNDLYHAGELLSLLN     |     |     |     |     |     |
| Xenopus1.2 | VCTERIYYFEYPHVTKLDEIATPNMIFPAVTFCNLNEFRFSRVTKNDLYHAGELLSLLN     |     |     |     |     |     |
| EFS        | TCTORIQQYYFQYPHVTKLDEISAANMTFPAITICNLNEFRFSKITKNDLYHAGELLTLLN   |     |     |     |     |     |
|            | 130                                                             | 140 | 150 | 160 | 170 | 180 |
| Rat        | NRYEIPDTQMADEKQLEILQDKANFRSFKPKPFNMREFYDRAGHDIRDMLLSCHFRGEAC    |     |     |     |     |     |
| Xenopus1.1 | NRYELPDSQLADEKVMEILQDKANFRNFKPKPFNMREFYDRTGHDIRDMLLNCKFRGEEC    |     |     |     |     |     |
| Xenopus1.2 | NRYELPDSQLADENVMEILQDKANFRNFKPKPFNMREFYDRTGHDIREMLLGCKFRGEEC    |     |     |     |     |     |
| EFS        | NRYEIPDPHLAERHILEALVEKANFRNFKPKPFNMREFYARAGHDMKDMLLHCIFKGEFC    |     |     |     |     |     |
|            | 190                                                             | 200 | 210 | 220 | 230 | 240 |
| Rat        | SAEDFKVVFTRYGKCYTFNSGQDGR-PRLKTMKGGTGNGLEIMLDIQQDEYLPVWGETDE    |     |     |     |     |     |
| Xenopus1.1 | SADNFVPVFTRYGKCYTFNSGRNG--PPLVTTKGGTGNGLELMLDIQQDEYLPVWGETDE    |     |     |     |     |     |
| Xenopus1.2 | SAEDFVPVFTRYGKCYTFNSGRNGR-SPFVTTKGGTGNGLELMMDIQQDEYLPVWGETDE    |     |     |     |     |     |
| EFS        | TAQDFKIVFTRYGKCYTFNSGQIKDQPIILTLEGGTGNGLELMLDIQQDEYLPVWGETDE    |     |     |     |     |     |
|            | 250                                                             | 260 | 270 | 280 | 290 | 300 |
| rat        | TSFEAGIKVQIHSQDEPPFIDQLGFGVAPGFQTFVSCQEQRLLIYLPSPWGTTCNAVMTMSD  |     |     |     |     |     |
| Xenopus1.1 | TSFEAGIKVQIHSQDEPPFIDQLGFGVAPGFQTFVSCQEQRLLTYLPPPWGDKSSAMDSE    |     |     |     |     |     |
| Xenopus1.2 | TSFEAGIKVQIHSQDEPPFIDQLGFGVAPGFQTFVSCQEQRLLTYLPPPWGDKSSAMDSE    |     |     |     |     |     |
| EFS        | TSFEAGIKVQIHSQSEPPFIDQLGFGVPPGFQTFVACQEQRLLRYLPPPWGDKSTPMSD     |     |     |     |     |     |
|            | 310                                                             | 320 | 330 | 340 | 350 | 360 |
| Rat        | FFDSYSITACRIDCETRYLVENCNCRMVHMPGDAPYCTPEQYKECADPALDFLVEKDQEY    |     |     |     |     |     |
| Xenopus1.1 | FFDTYSISACRIDCETRYLVENCNCRMVHMPGDAAAYCTPELYKECADPALDFLVEKDNDF   |     |     |     |     |     |
| Xenopus1.2 | FFDTYSITACRIDCETRYLVENCNCRMVHMPGDAAAYCTPELYKECADPALDFLVEKDNDF   |     |     |     |     |     |
| EFS        | FFDTYSITACRIDCETRYLVENCNCRMVHMPGDAPYCTPEQYKECADPALDFLVEKDSVF    |     |     |     |     |     |
|            | 370                                                             | 380 | 390 | 400 | 410 | 420 |
| Rat        | CVCEMPCNLTRYGKELSMVKIPSKASAKYLAKKFNKSEQYIGENILVLDIFFEVLNYETI    |     |     |     |     |     |
| Xenopus1.1 | CVCETPCNMTRYGKELSMVKIPSKASARYLAKKYNKSEQYIADNILVLDIFFEALNYETI    |     |     |     |     |     |
| Xenopus1.2 | CVCETPCNMTRYGKELSMVKIPSKASARYLAKKYNKSEQYIAENILVLDIFFEALNYETI    |     |     |     |     |     |
| EFS        | CTCETPCNMTRYGKELSMVKIPSKASAKYLAKKYNKSEDIYIGENILVLDIFFEALNYETI   |     |     |     |     |     |
|            | 430                                                             | 440 | 450 | 460 | 470 | 480 |
| Rat        | EQKKAYEIVAGLLGDIGGQMGFLFIGASILTVLELFDYAYEVIKHRLCRRGKCKQKEAKRSSA |     |     |     |     |     |
| Xenopus1.1 | EQKKAYEVAGLLGDIGGQMGFLFIGASILTVLELFDYAYEVLRYKLCGGAKCGKDSKRNNN   |     |     |     |     |     |
| Xenopus1.2 | EQKKAYEVAGLLGDIGGQMGFLFIGASILTVLELFDYAYEVLRYKLCGGAKCRKDSKRNNN   |     |     |     |     |     |
| EFS        | EQKKAYEVAGLLGDIGGQMGFLFIGASLLTILELFDYVYEVVKHKMCGVLRMGKQQRNNN    |     |     |     |     |     |
|            | 490                                                             | 500 | 510 | 520 |     |     |
| Rat        | DKGVALSLDDVKRHNPCESLRGHPAGMTYAANILPHHPARGTFEDFTC                |     |     |     |     |     |
| Xenopus1.1 | DKGVTLSLDDVKRHAPIEGVRGHPAGMSYTANILPHHAVRGAFEDFTC                |     |     |     |     |     |
| Xenopus1.2 | DKGVTLSLDDVKRHAPCEGVRGHPAGMSYTANILPHHAVRGAFEDFTC                |     |     |     |     |     |
| EFS        | DKGVTLSLDDIKRHNPCESLRGHPTGMSYTANMLPHHPPRNTFEDFTC                |     |     |     |     |     |

**Supplemental Figure 1.** Alignment of ASIC1 proteins. Transmembrane domains TM1 and TM2 are underlined. The three residues in the  $\beta 1$ - $\beta 2$  linker are highlighted in yellow. Identical residues are in red, similar in green and blue, and non-conserved in black. EFS=elephant shark. EFS=elephant shark.
